# Supplementary material for: Efficacy and safety of brolucizumab versus aflibercept in eyes with early persistent retinal fluid: 96-week outcomes from the HAWK and HARRIER studies
Source: PubMed Central journal article supplement (PMC10102125; doi:10.1038/s41433-022-02092-5), 2022-05-21
Supplement: 41433_2022_2092_MOESM1_ESM.pdf [file 41433_2022_2092_MOESM1_ESM.pdf]

**Supplementary Table 1. Demographic and clinical characteristics at baseline of patients with early persistent retinal fluid**

| <b>Characteristics</b>                                             | <b>Brolucizumab 6 mg<br/>N=82 patients</b> | <b>Aflibercept 2 mg<br/>N=140 patients</b> |
|--------------------------------------------------------------------|--------------------------------------------|--------------------------------------------|
| <b>Age at index (patient, years)</b>                               |                                            |                                            |
| Mean (SD)                                                          | 75.6 (9.7)                                 | 74.4 (7.7)                                 |
| <b>Gender (patient; n, %)</b>                                      |                                            |                                            |
| Male                                                               | 44 (53.7)                                  | 79 (56.4)                                  |
| Female                                                             | 38 (46.3)                                  | 61 (43.6)                                  |
| <b>nAMD laterality (patient; n, %)</b>                             |                                            |                                            |
| Unilateral                                                         | 67 (81.7%)                                 | 114 (81.4%)                                |
| Bilateral                                                          | 15 (18.3%)                                 | 26 (18.6%)                                 |
| <b>BCVA (ETDRS letters)</b>                                        |                                            |                                            |
| Mean (SD)                                                          | 53.1 (16.6)                                | 58.8 (14.3)                                |
| ≤55 letters (n, %)                                                 | 40 (48.8)                                  | 50 (35.7)                                  |
| 56–70 letters (n, %)                                               | 29 (35.4)                                  | 60 (42.9)                                  |
| ≥71 letters (n, %)                                                 | 13 (15.9)                                  | 30 (21.4)                                  |
| <b>CST (μm)</b>                                                    |                                            |                                            |
| Mean (SD)                                                          | 535.0 (184.8)                              | 479.4 (151.5)                              |
| <400 μm (n, %)                                                     | 20 (24.4)                                  | 44 (31.4)                                  |
| ≥400 μm (n, %)                                                     | 62 (75.6)                                  | 96 (68.6)                                  |
| <b>CNV type</b>                                                    |                                            |                                            |
| Predominantly classic                                              | 42 (51.2)                                  | 56 (40.0)                                  |
| Minimally classic                                                  | 7 (8.5)                                    | 8 (5.7)                                    |
| Occult                                                             | 33 (40.2)                                  | 76 (54.3)                                  |
| <b>Area of lesion associated with CNV,<br/>mm<sup>2</sup> (SD)</b> | 4.5 (4.6)                                  | 4.1 (4.0)                                  |
| <b>CNV location</b>                                                |                                            |                                            |
| Subfoveal                                                          | 57 (69.5)                                  | 97 (69.3)                                  |
| Juxtafoveal                                                        | 17 (20.7)                                  | 26 (18.6)                                  |
| Extrafoveal                                                        | 8 (9.8)                                    | 17 (12.1)                                  |

Early persistent fluid in HAWK & HARRIER

|                                       |           |            |
|---------------------------------------|-----------|------------|
| <b>IRF (n, %)</b>                     |           |            |
| Present                               | 52 (63.4) | 65 (46.4)  |
| Absent                                | 30 (36.6) | 75 (53.6)  |
| <b>SRF (n, %)</b>                     |           |            |
| Present                               | 58 (70.7) | 113 (80.7) |
| Absent                                | 24 (29.3) | 27 (19.3)  |
| <b>Sub-RPE fluid (n, %)</b>           |           |            |
| Present                               | 33 (40.2) | 58 (41.4)  |
| Absent                                | 49 (59.8) | 82 (58.6)  |
| <b>Intraretinal hemorrhage (n, %)</b> |           |            |
| Present                               | 15 (18.3) | 11 (7.9)   |
| Absent                                | 67 (81.7) | 129 (92.1) |
| <b>Subretinal hemorrhage (n, %)</b>   |           |            |
| Present                               | 10 (12.2) | 14 (10.0)  |
| Absent                                | 72 (87.8) | 126 (90.0) |

---

BCVA, best corrected visual acuity; CNV, choroidal neovascularization; CST, central subfield thickness; ETDRS, Early Treatment Diabetic Retinopathy Study; IRF, Intraretinal fluid; nAMD, neovascular age-related macular degeneration; RPE, retinal pigment epithelium; SD, standard deviation; SRF, subretinal fluid.
