# Supplementary material for: Efficacy and safety of brolucizumab versus aflibercept in eyes with early persistent retinal fluid: 96-week outcomes from the HAWK and HARRIER studies
Source: PubMed Central journal article supplement (PMC10102125; doi:10.1038/s41433-022-02092-5), 2022-05-21
Supplement: 41433_2022_2092_MOESM2_ESM.pdf [file 41433_2022_2092_MOESM2_ESM.pdf]

**Supplementary Table 2. Patient disposition to Week 96 in patients with early persistent retinal fluid**

| <b>Reason for discontinuation</b> | <b>Brolucizumab 6 mg<br/>N=82; n (%)</b> | <b>Aflibercept 2 mg<br/>N=140; n (%)</b> |
|-----------------------------------|------------------------------------------|------------------------------------------|
| Adverse event                     | 1 (1.2)                                  | 4 (2.9)                                  |
| Death                             | 1 (1.2)                                  | 3 (2.1)                                  |
| Lack of efficacy                  | 0 (0.0)                                  | 4 (2.9)                                  |
| Lost to follow-up                 | 2 (2.4)                                  | 3 (2.1)                                  |
| Physician decision                | 0 (0.0)                                  | 1 (0.7)                                  |
| Progressive disease               | 0 (0.0)                                  | 6 (4.3)                                  |
| Withdrawal by subject             | 1 (1.2)                                  | 6 (4.3)                                  |
| Other                             | 2 (2.4)                                  | 0 (0.0)                                  |
| <b>Total</b>                      | <b>7 (8.5)</b>                           | <b>27 (19.3)</b>                         |
