# Supplementary material for: Efficacy and safety of brolucizumab versus aflibercept in eyes with early persistent retinal fluid: 96-week outcomes from the HAWK and HARRIER studies
Source: PubMed Central journal article supplement (PMC10102125; doi:10.1038/s41433-022-02092-5), 2022-05-21
Supplement: 41433_2022_2092_MOESM3_ESM.pdf [file 41433_2022_2092_MOESM3_ESM.pdf]

**Supplementary Table 3. Ocular adverse events and serious ocular adverse events in eyes with persistent retinal fluid**

| <b>Primary system organ class / Preferred term</b>                                           | <b>Brolucizumab 6 mg<br/>N=82; n (%)</b> | <b>Aflibercept 2 mg<br/>N=140; n (%)</b> |
|----------------------------------------------------------------------------------------------|------------------------------------------|------------------------------------------|
| <b>Ocular adverse events reported in ≥3% of study participants in either treatment group</b> |                                          |                                          |
| Number of subjects with at least one event                                                   | 40 (48.8)                                | 75 (53.6)                                |
| Eye disorders                                                                                | 39 (47.6)                                | 71 (50.7)                                |
| Visual acuity reduced                                                                        | 7 (8.5)                                  | 14 (10.0)                                |
| Conjunctival hemorrhage                                                                      | 5 (6.1)                                  | 13 (9.3)                                 |
| Blepharitis                                                                                  | 5 (6.1)                                  | 4 (2.9)                                  |
| Vitreous floaters                                                                            | 5 (6.1)                                  | 2 (1.4)                                  |
| Retinal hemorrhage                                                                           | 4 (4.9)                                  | 10 (7.1)                                 |
| Eye pain                                                                                     | 4 (4.9)                                  | 7 (5.0)                                  |
| Cataract                                                                                     | 3 (3.7)                                  | 5 (3.6)                                  |
| Chalazion                                                                                    | 3 (3.7)                                  | 1 (0.7)                                  |
| Retinal pigment epithelial tear                                                              | 3 (3.7)                                  | 1 (0.7)                                  |
| Dry eye                                                                                      | 2 (2.4)                                  | 9 (6.4)                                  |
| Vision blurred                                                                               | 1 (1.2)                                  | 5 (3.6)                                  |
| Vitreous detachment                                                                          | 1 (1.2)                                  | 5 (3.6)                                  |
| Injury, poisoning and procedural complications                                               | 4 (4.9)                                  | 6 (4.3)                                  |
| Corneal abrasion                                                                             | 3 (3.7)                                  | 4 (2.9)                                  |
| Investigations                                                                               | 3 (3.7)                                  | 6 (4.3)                                  |
| Intraocular pressure increased                                                               | 3 (3.7)                                  | 5 (3.6)                                  |
| <b>Serious ocular adverse events</b>                                                         |                                          |                                          |
| Number of subjects with at least one serious ocular adverse event                            | 3 ( 3.7)                                 | 5 (3.6)                                  |
| Eye disorders                                                                                | 2 (2.4)                                  | 4 (2.9)                                  |
| Macular hole                                                                                 | 1 (1.2)                                  | 1 (0.7)                                  |
| Retinal tear                                                                                 | 1 (1.2)                                  | 0 (0.0)                                  |

Early persistent fluid in HAWK & HARRIER

|                             |         |         |
|-----------------------------|---------|---------|
| Visual acuity reduced       | 0 (0.0) | 2 (1.4) |
| Retinal detachment          | 0 (0.0) | 1 (0.7) |
| Infections and infestations | 1 (1.2) | 1 (0.7) |
| Endophthalmitis             | 1 (1.2) | 1 (0.7) |

---
